# Supplementary material for: SLAMF7/STAT6 Pathway Inhibit Innate Immune Response in Late-Stage Human Acanthamoeba Keratitis: A Comparative Transcriptome Analysis
Source: Preprints.org preprint supplement (doi:10.20944/preprints202301.0009.v1), 2023-01-03
Supplement: Supplementary file 1 [file supplementary]

| **Name** | **Forward** | **Reverse** |
| --- | --- | --- |
| CD8a | CCCTTTACTGCAACCACAGG | GTCTCCCGATTTGACCACAG |
| CD103 | ACCATTCTTTGCCTATCATCATTAAAG | CTCCATGCTGCTCTAGATCATC |
| CD14 | GACCTAAAGATAACCGGCACC | GCAATGCTCAGTACCTTGAGG |
| CD33 | GGTGTGACTACGGAGAGAACC | GGTAGGGTGGGTGTCATTCC |
| MPO | CCGGGATGGTGATCGGTTTT | CAGATGATCCGGGGCAATGA |
| CCL3 | GCAACCAGTTCTCTGCATCA | TGGCTGCTCGTCTCAAAGTA |
| CCL23 | CATCTCCTACACCCCACGAAG | GGGTTGGCACAGAAACGTC |
| β-Actin(human) | GATTACTGCTCTGGCTCCTAGC | GACTCATCGTACTCCTGCTTGC |

**Table S1.** Nucleotide sequences of human primers for RT-qPCR

**Table S2.** Demographics and Clinical Characteristics of patients with acanthamoeba keratitis

| **Parameter** | **Patients 1** | **Patients 2** | **Patients 3** |
| --- | --- | --- | --- |
| **Subject (Age, gender)** | 57y, FM | 55y, FM | 20y, M |
| **Onset time (days)** | 37 | 34 | 27 |
| **Risk Factor** | Unknown | Agricultural injury,  Tap water exposure | Orthokeratology,  Tap water exposure |
| **Preoperative/** **Postoperative visual acuity** | HM / 0.01 | CF / 0.01 | 0.01 / 0.3 |
| **Steroids used** | Y | N | N |
| **Ulcer size** (mm) | 9 | 7 | 5 |
| **Scraping (+/-)** | + | + | + |
| **Culture (+/-)** | + | + | + |
| **IVCM (+/-)** | + | + | + |
| **Surgical Interventions** | PK | PK | DALK |

**
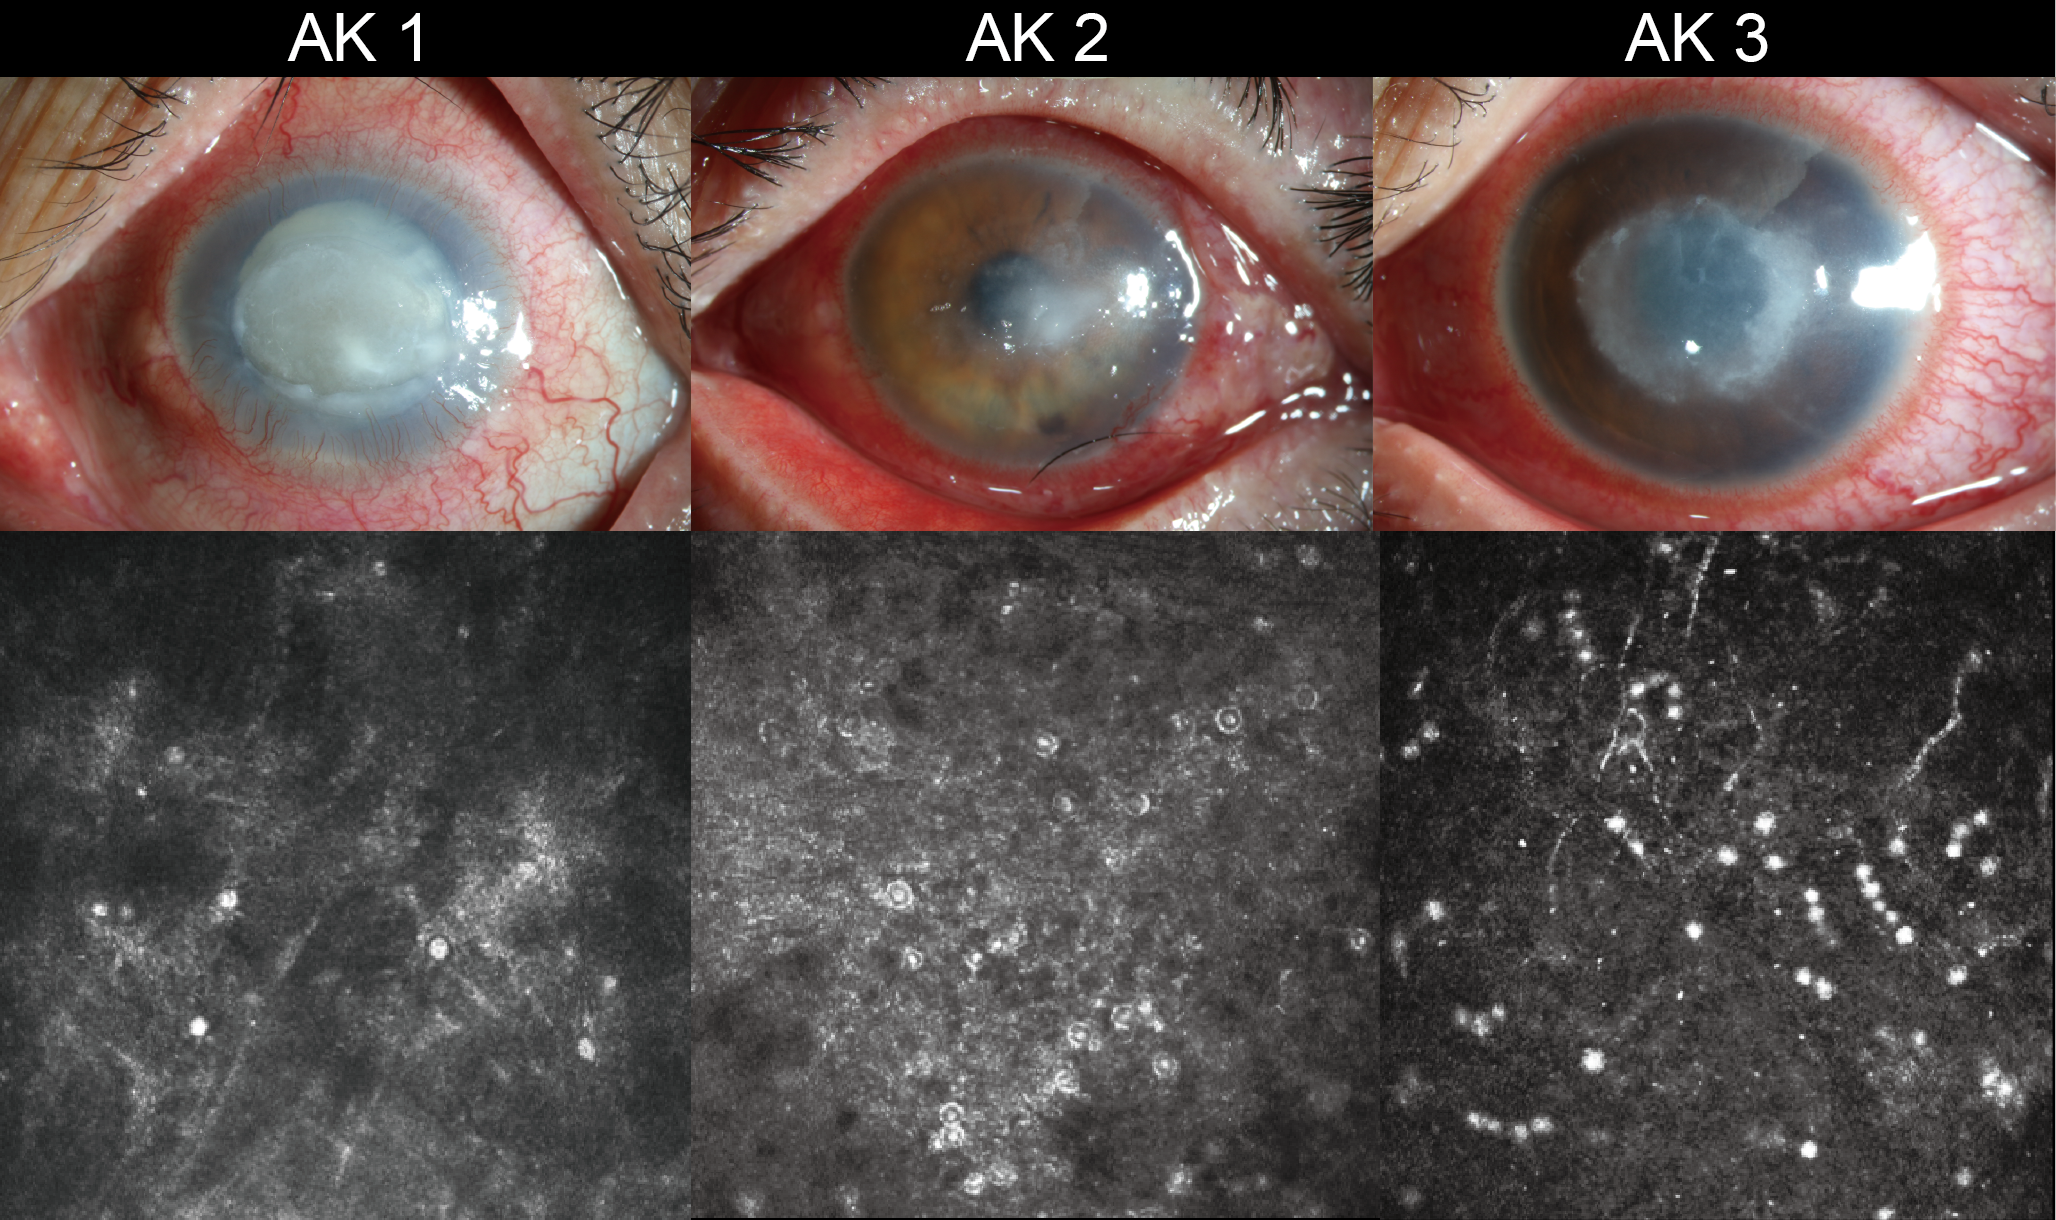
**

**Figure S1:** the slit-lamp and in vivo confocal microscopy images of three recruited patients with acanthamoeba keratitis
